# Supplementary material
Source: Research Square preprint supplement (doi:10.21203/rs.3.rs-8543209/v1)

**Supplementary Material**


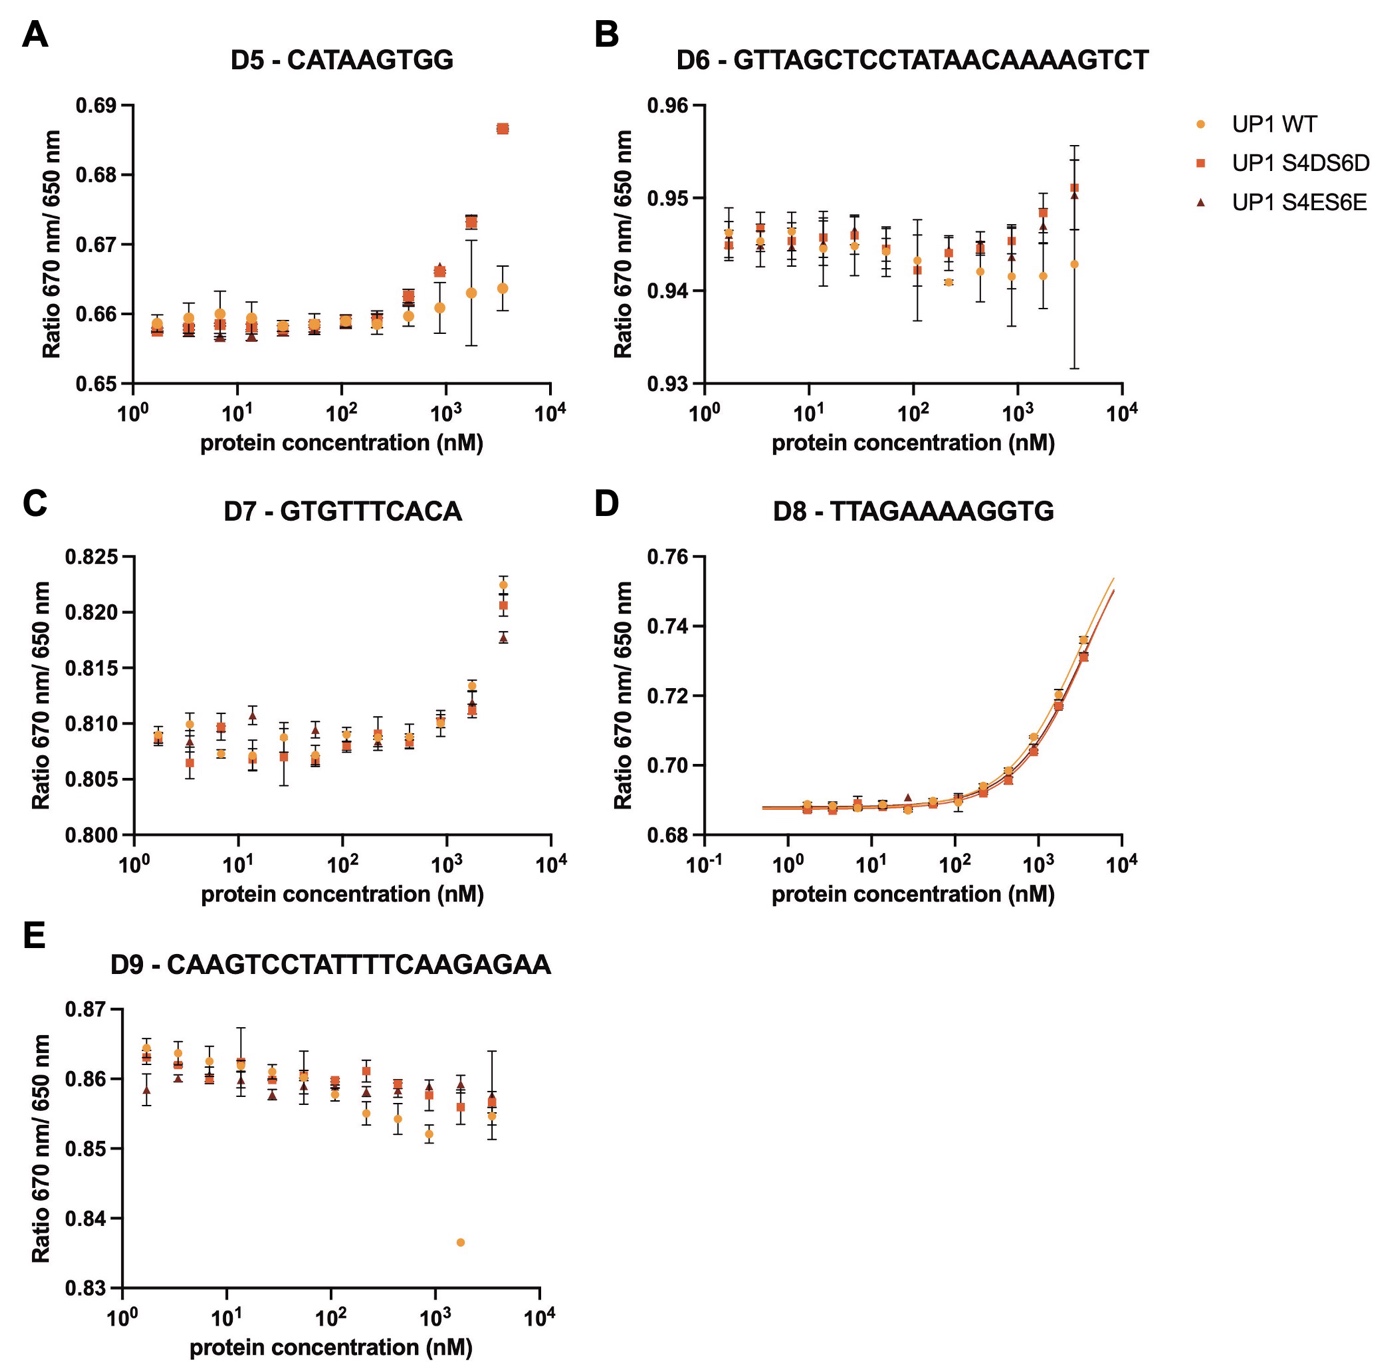


**Figure S1 Spectral shift dose–response curves** for UP1 wild type (yellow), UP1 S4D/S6D (orange), and UP1 S4E/S6E (brown) binding to (**A**) D5, (**B**) D6, (**C**) D7, (**D**) D8, (**E**) D9 DNA oligos.


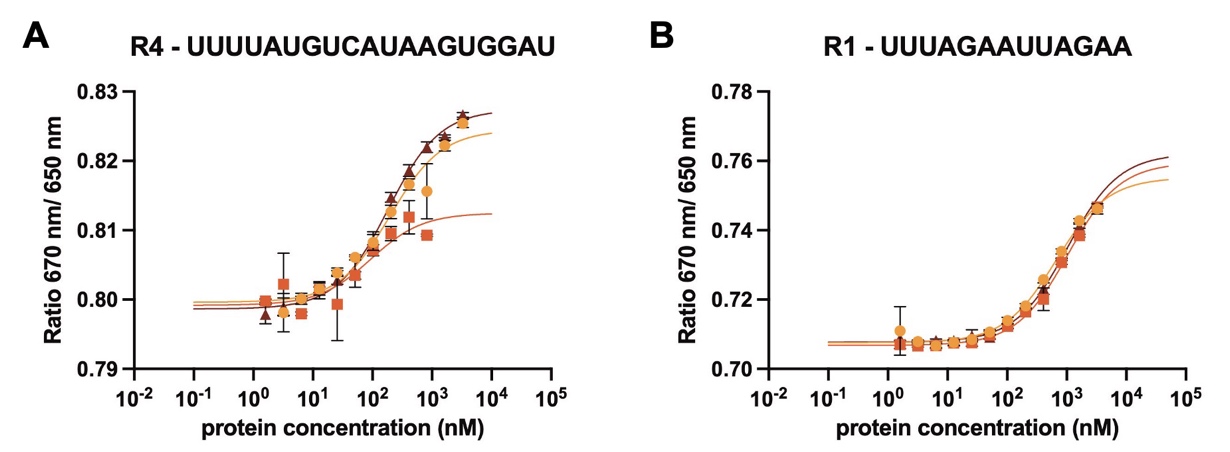


**Figure S2 Spectral shift dose–response curves** for UP1 wild type (yellow), UP1 S4D/S6D (orange), and UP1 S4E/S6E (brown) binding to (**A**) R4 and (**B**) R1 RNA oligos.


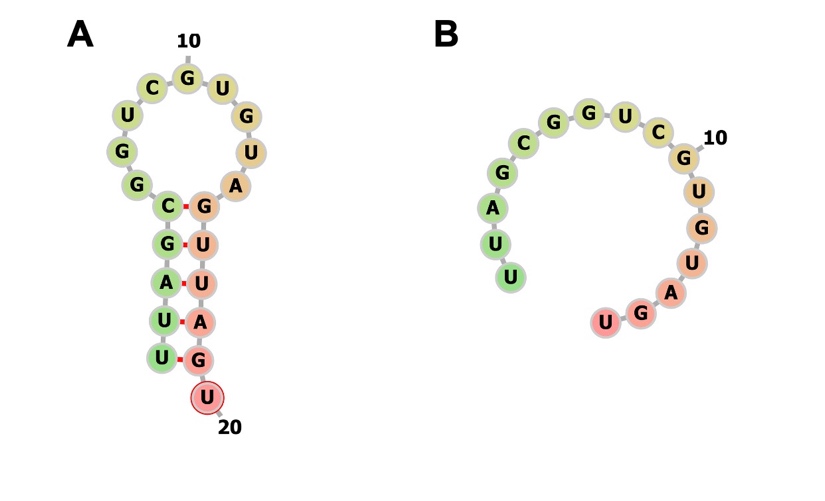


**Figure S3: RNA oligos secondary structure**. Visualization of predicted secondary structures of the (**A**) 20-mer and (**B**) 16-mer.


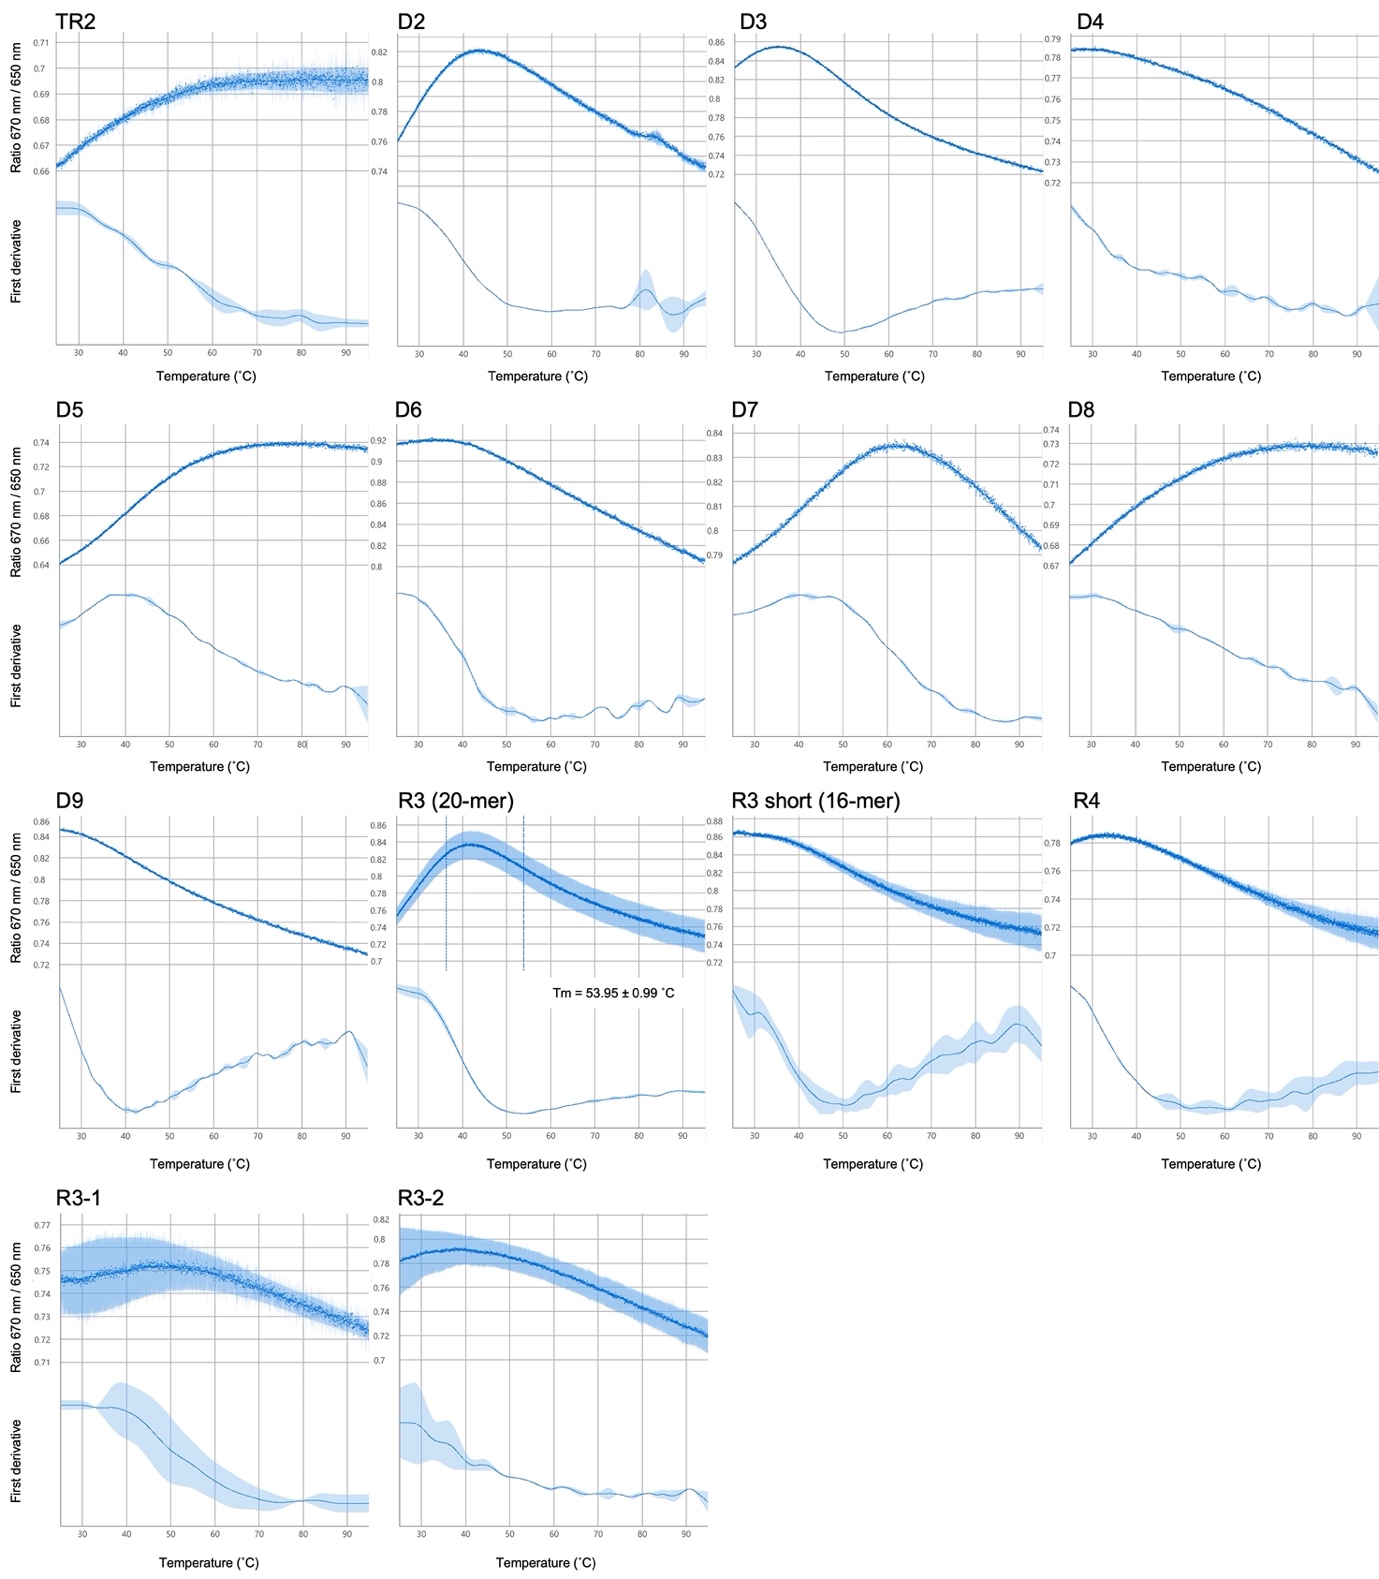


**Figure S4: Thermal unfolding curves**. Thermal unfolding curves of CY5-labelled oligonucleotides. Oligo names are shown above the plots. Upper and lower limits are shown as dotted lines in the R3 plot.


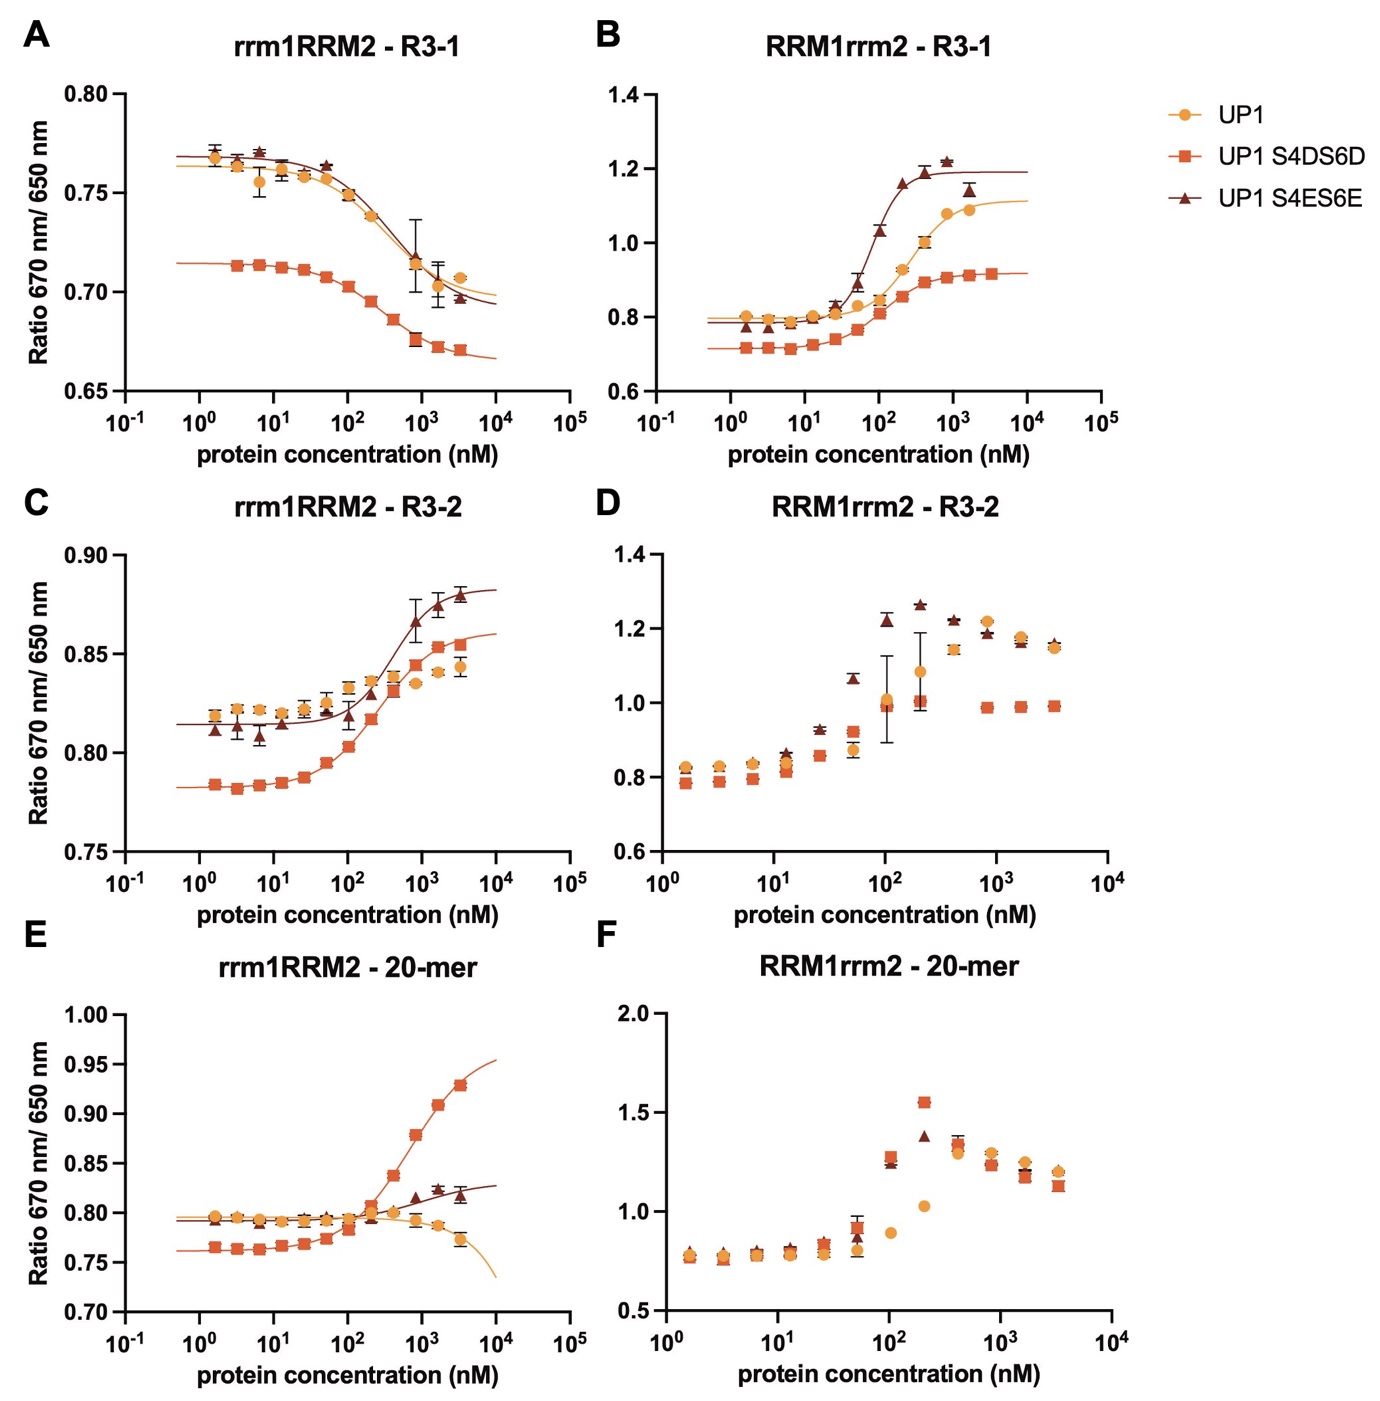


**Figure S5 Spectral shift dose–response curves** for UP1 wild type (yellow), UP1 S4D/S6D (orange), and UP1 S4E/S6E (brown) rrm1RRM2 binding to (**A**) R3-1, (**C**) R3-2, and (**E**) 20-mer RNA oligos. (**B**) UP1 wild type (yellow), UP1 S4D/S6D (orange), and UP1 S4E/S6E (brown) RRM1rrm2 binding to R3-1 RNA oligo. Biphasic binding curves for the (**D**) R3-2 and (**F**) 20-mer RNA oligos. RNA names are shown above the plots.

**Figure S6: NMR of UP1**. Superimposition of 1H-15N HSQC spectra of 15N-labeled UP1 wt, S4DS6D (D), S4ES6E (E) in the free (red) and 16-mer and 20-mer bound form (blue). The amide cross-peaks fully disappeared upon increase of RNA during the titration.

**Figure S7**: **N-tail interaction with RNA.** Frequency of H-bond and VDW intramolecular contacts formed by residues 1–12 of the UP1 N-tail with 16-mer, calculated from 10-µs MD simulations of UP1 wt, and S4 and S6 phosphorylated UP1 (wt-Pi).


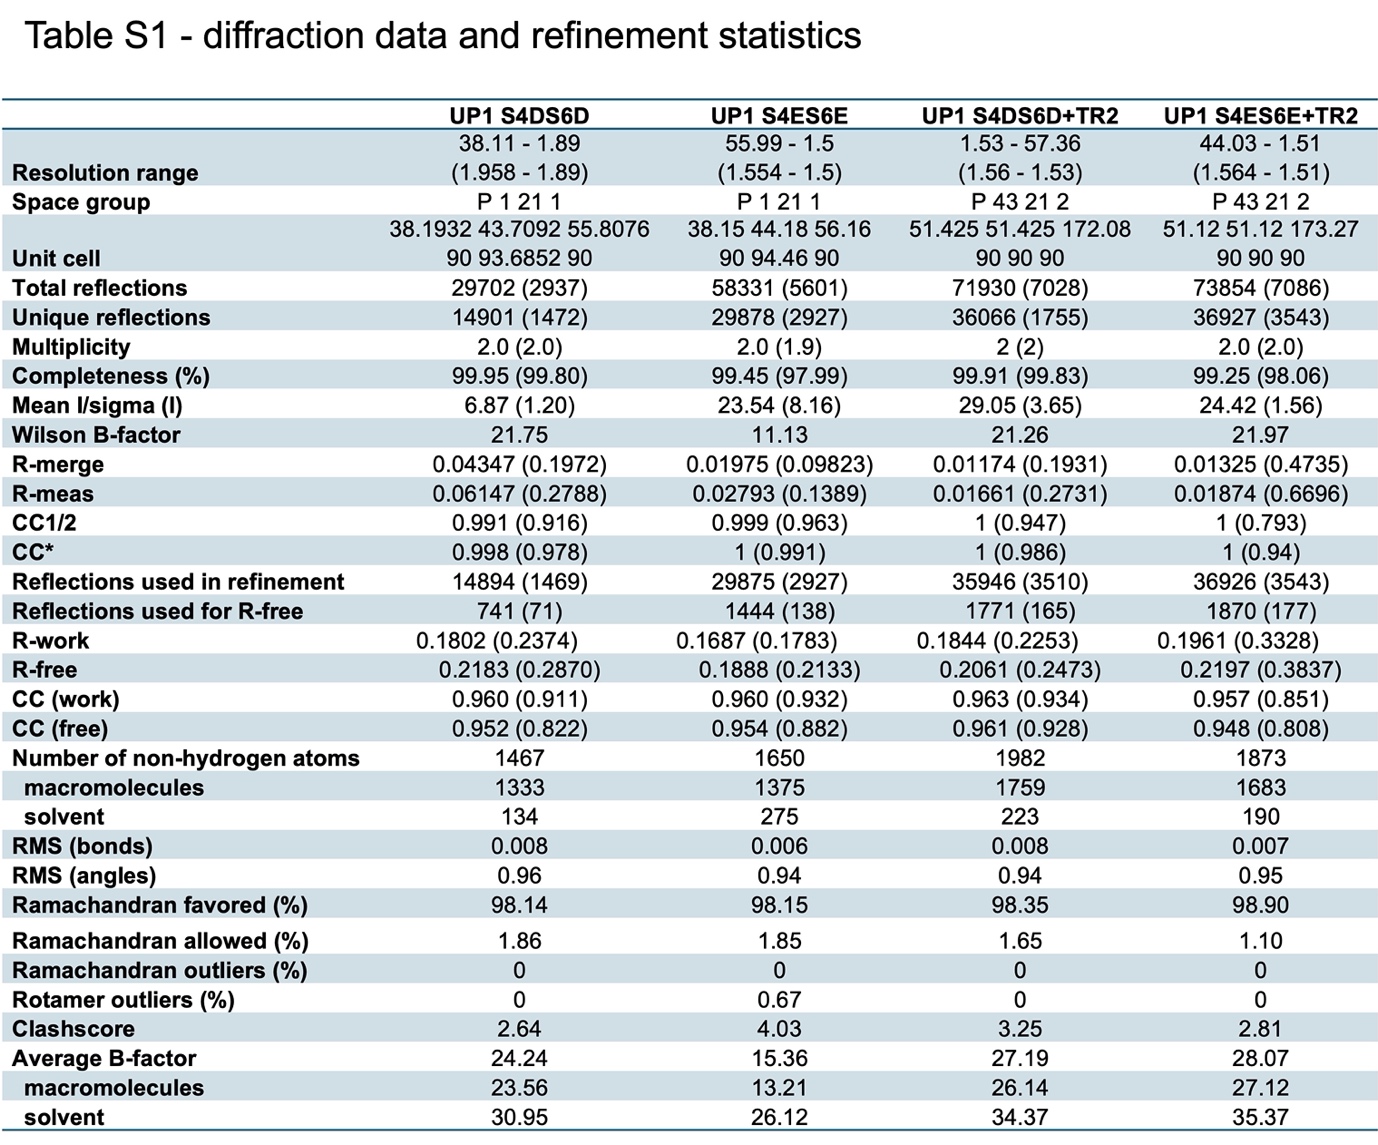

Supplement: Supplementary file 1 [file b38292d16b7f55ee86721ce4.docx]
